# Supplementary material
Source: publisher figshare collection journal article supplement (https://acs.figshare.com/ndownloader/files/5186467)

SUPPLEMENTARY MATERIALS - ORTEP figures for:

"Stereochemistry in Functionalised Macrocyclic Complexes: Control of Hydroxyl Substituent Orientation" (ic034912o)

**Figure 1.** View of the complex  $[\text{Co}(\mathbf{5})\text{Cl}_2]\text{ClO}_4$ , with displacement ellipsoids drawn at the 20% probability level.

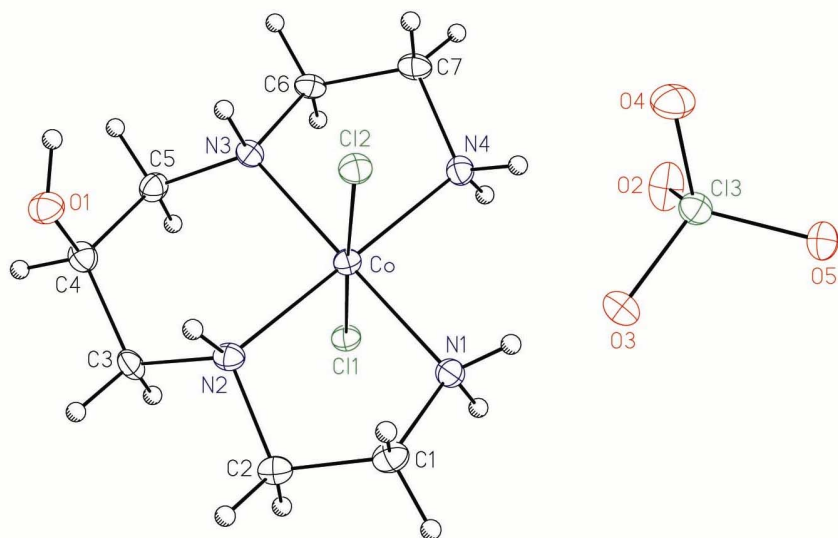

(Lattice view)

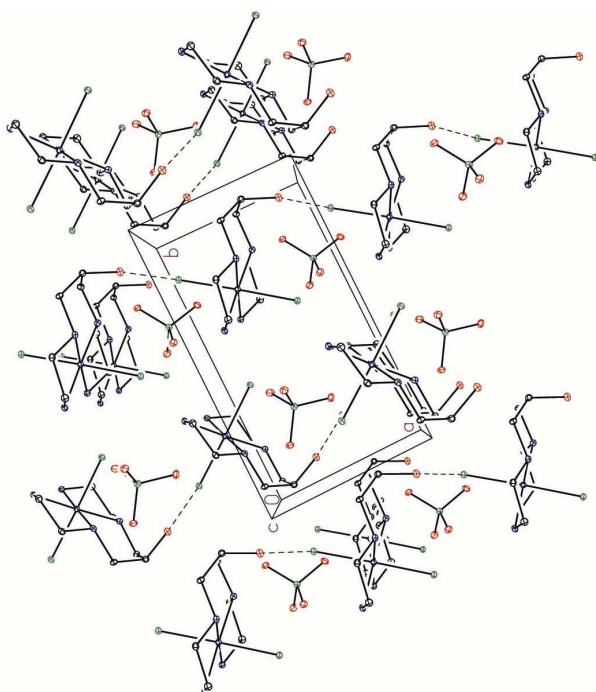

**Figure 2.** View of one of the two independent molecules in the complex  $[\text{Cu}(\mathbf{5})(\text{OCIO}_3)]\text{ClO}_4$ , with bonds to perchlorate donors O4, O8 only shown. Displacement ellipsoids drawn at the 20% probability level.

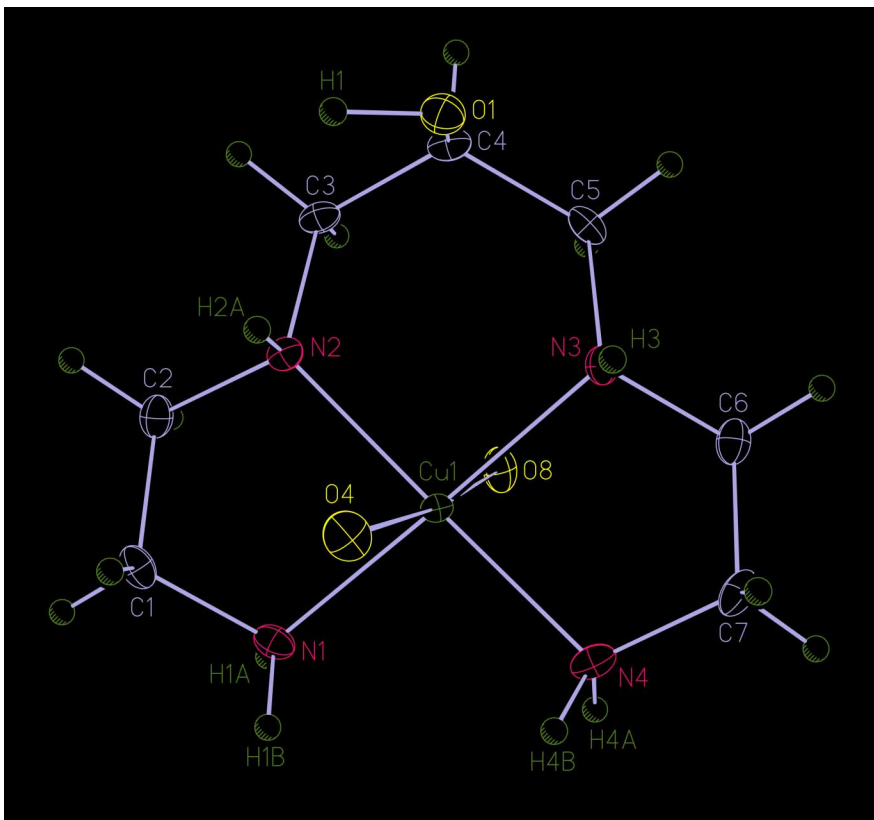

(Lattice view)

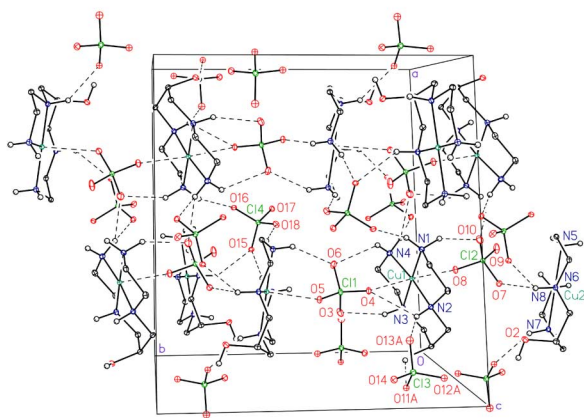

**Figure 3.** View of the complex  $[\text{Cu}(\mathbf{1})\text{Cl}]\text{ClO}_4$  with displacement ellipsoids drawn at the 20% probability level.

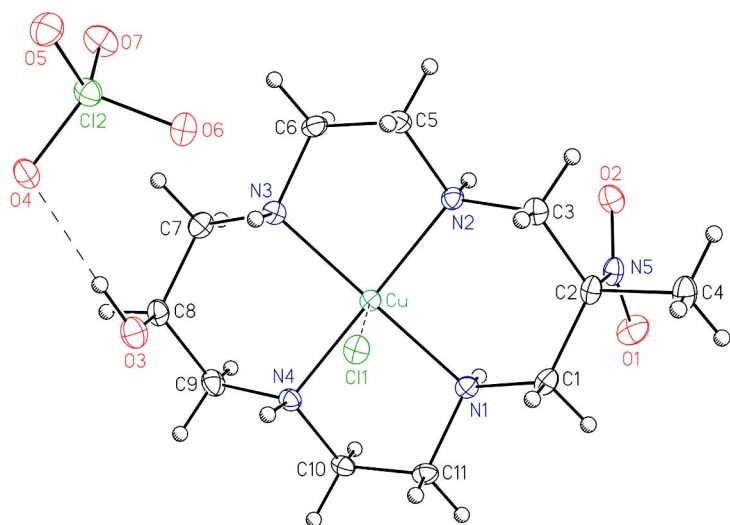

(Lattice view)

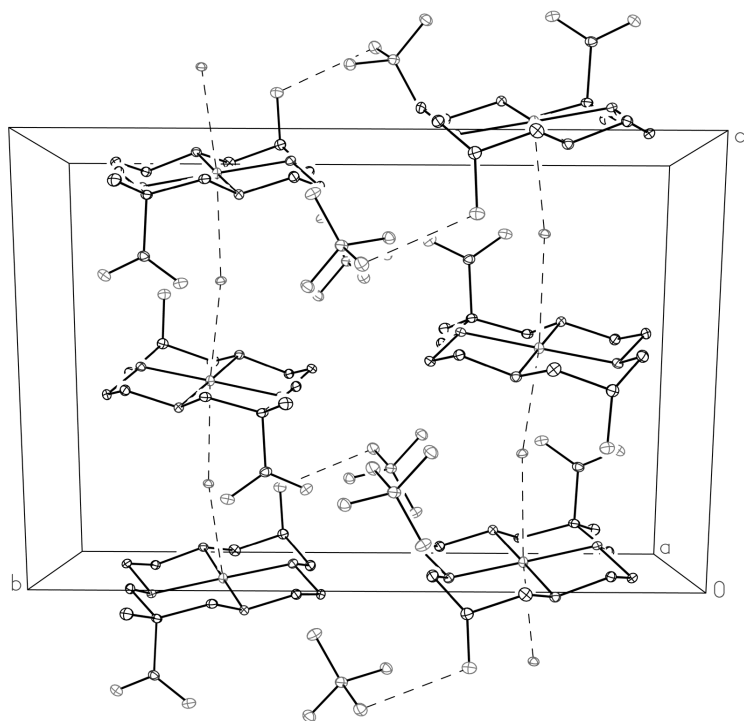

**Figure 4.** View of one of the two independent molecules in the complex [Co(2H)Cl<sub>2</sub>]Cl<sub>2</sub>·2H<sub>2</sub>O (**Co2A**) with displacement ellipsoids drawn at the 20% probability level.

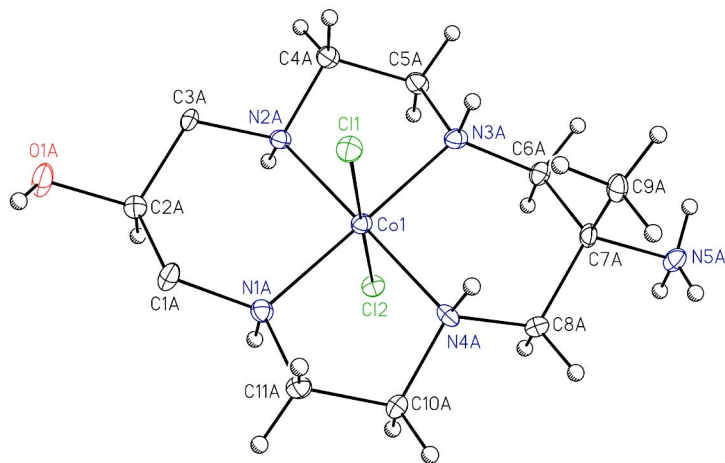

(Lattice view)

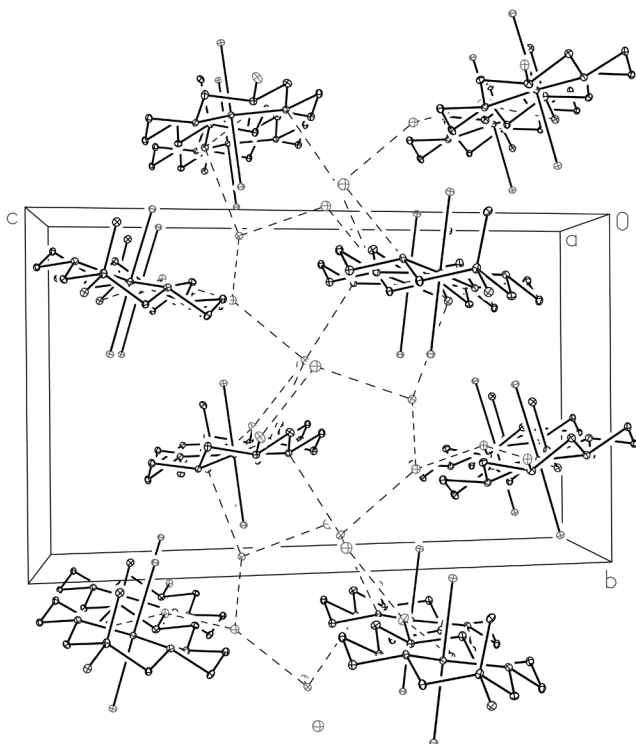

**Figure 5.** View of the complex  $[\text{Co}(\mathbf{2})\text{Cl}]\text{Cl}_2 \cdot 2\text{H}_2\text{O}$  (**Co2B**). Non-bonded chlorine ions and water molecules omitted for clarity. Displacement ellipsoids drawn at the 30% probability level.

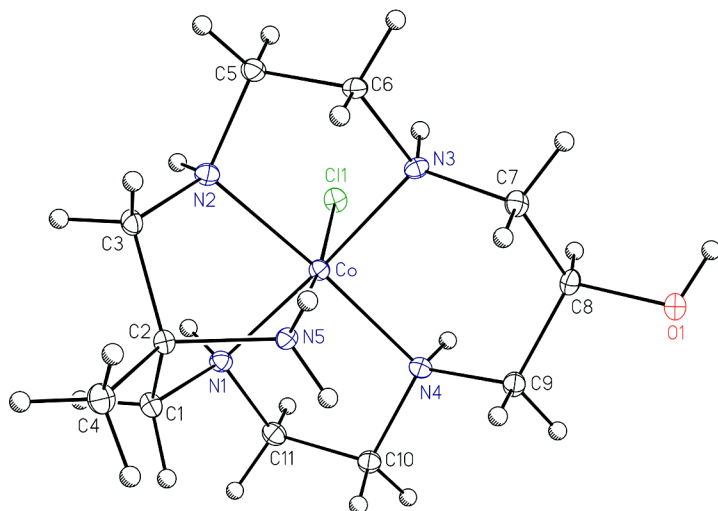

(Lattice view)

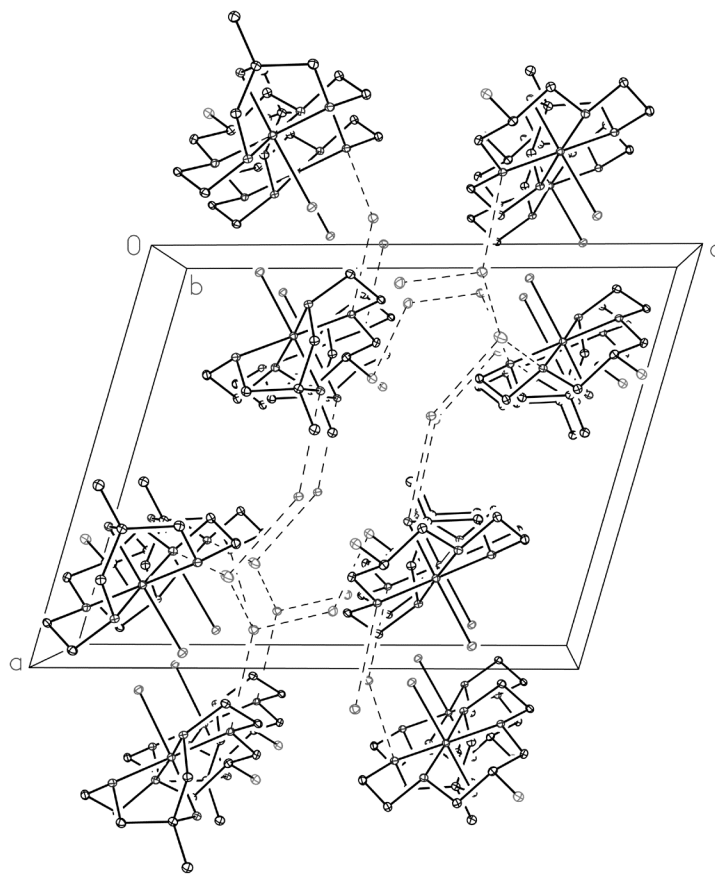

**Figure 6.** View of the complex  $[\text{Co}(\mathbf{2})\text{Cl}]\text{Cl}_2\cdot\text{H}_2\text{O}$  (**Co2C**) with displacement ellipsoids drawn at the 30% probability level.

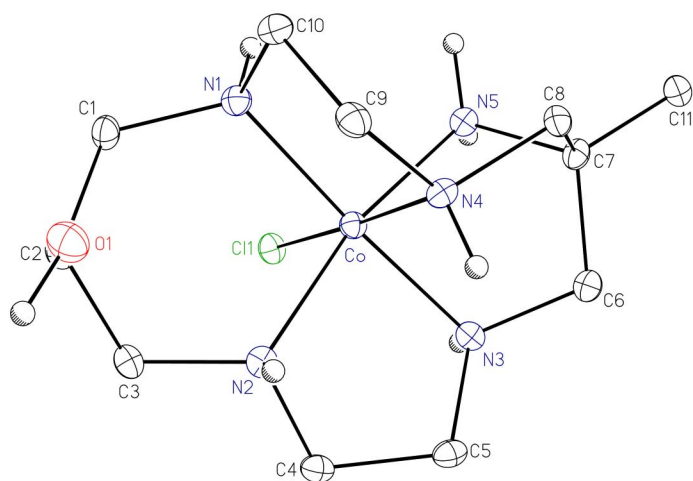

(Lattice view)

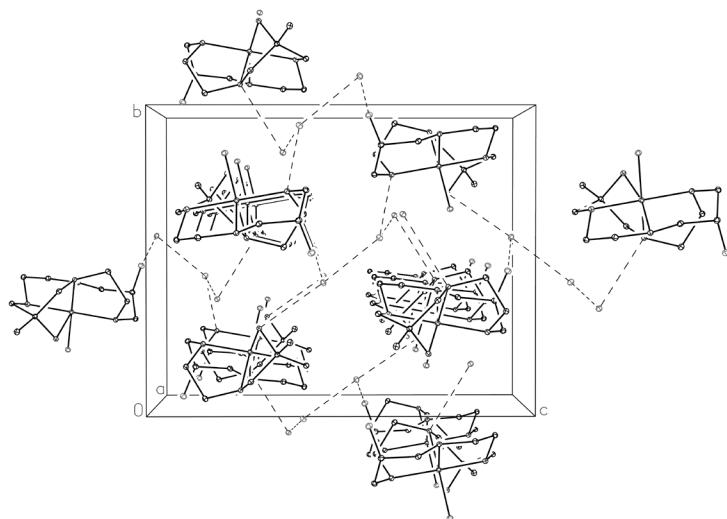

**Figure 7.** View of the complex  $[\text{Co}(\text{2H})\text{Cl}_2]\text{Cl}_2 \cdot \text{H}_2\text{O}$  (**Co2D**) with displacement ellipsoids drawn at the 30% probability level.

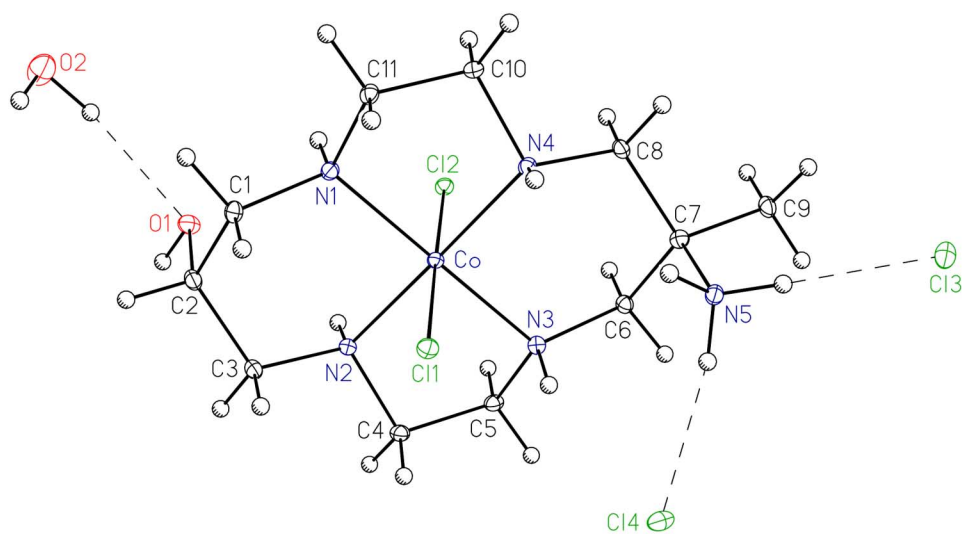

(Lattice view)

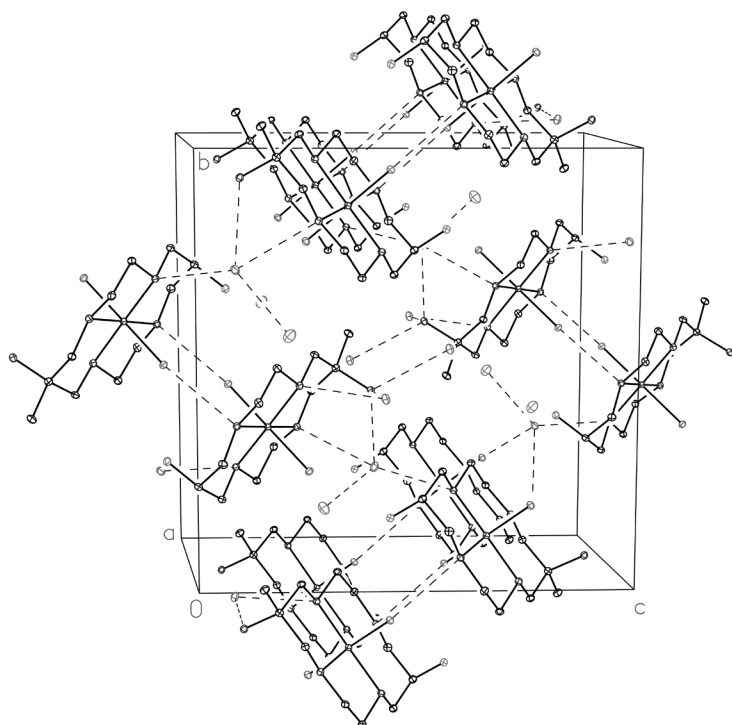

**Figure 8.** View of the complex  $[\text{Co}(\mathbf{2})\text{Cl}](\text{ClO}_4)_2 (\mathbf{Co2E})$ . Non-bonded perchlorate ions omitted for clarity. Displacement ellipsoids drawn at the 10% probability level.

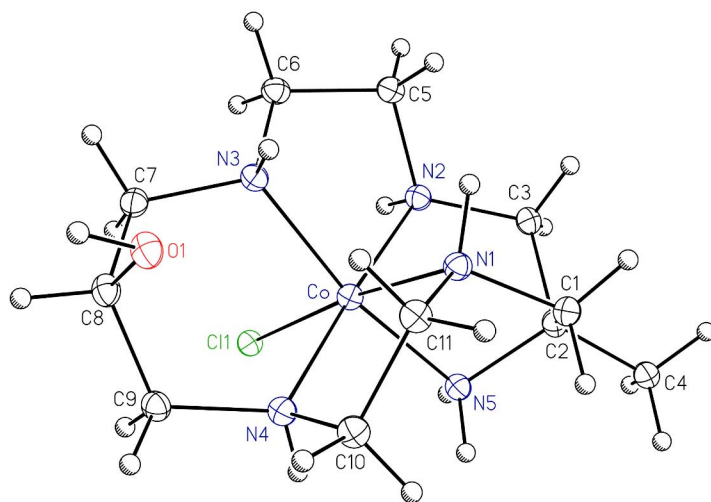

(Lattice view)

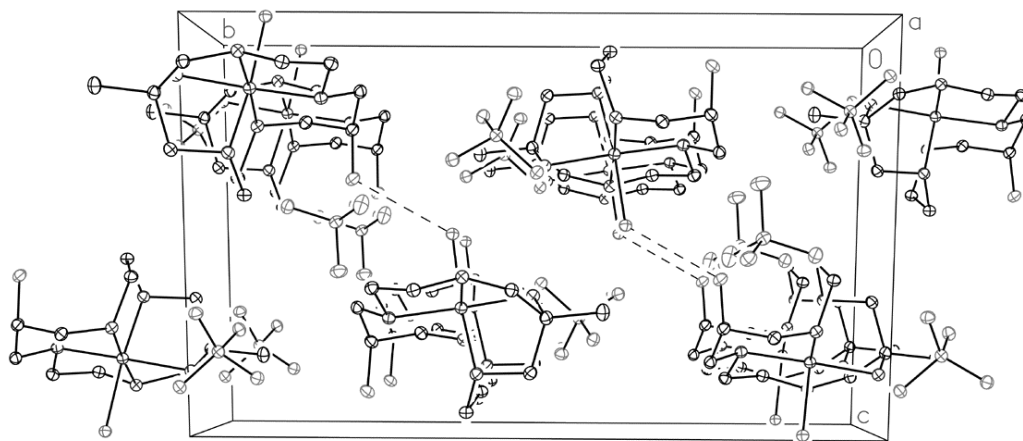

Supplement: Supplementary file 1 [file 5186467]
